# Supplementary material for: Aging of quinoxaline-based polymer solar cells under UV-free white light
Source: Royal Society of Chemistry journal article supplement (doi:10.1039/d3se00987d), 2023-12-24
Supplement: d3se00987d1.pdf [file d3se00987d1.pdf]

# Supporting Information

## Aging of quinoxaline-based polymer solar cells under UV-free white light

Shahidul Alam<sup>1,2,3\*</sup>, Md Moidul Islam<sup>2,3</sup>, Rico Meitzner<sup>2,3</sup>, Martin Hager<sup>2</sup>, Ulrich S. Schubert<sup>2,3</sup>, Frédéric Laquai<sup>1</sup>, Harald Hoppe<sup>2,3</sup>, Yingping Zou<sup>4</sup>

<sup>1</sup>King Abdullah University of Science and Technology (KAUST), KAUST Solar Center (KSC), Physical Sciences and Engineering Division (PSE), Material Science and Engineering Program (MSE), Thuwal 23955-6900, Kingdom of Saudi Arabia

<sup>2</sup>Laboratory of Organic and Macromolecular Chemistry (IOMC), Friedrich Schiller University Jena, Humboldtstr. 10, D-07743 Jena, Germany

<sup>3</sup>Center for Energy and Environmental Chemistry Jena (CEEC Jena), Friedrich Schiller University Jena, Philosophenweg 7a, D-07743 Jena, Germany

<sup>4</sup>College of Chemistry and Chemical Engineering, Central South University, Changsha 410083, China

### Table of Contents

|                                                    |   |
|----------------------------------------------------|---|
| 1. Processing conditions .....                     | 2 |
| 2. PV parameters .....                             | 2 |
| 3. Aging fit .....                                 | 3 |
| 2. Ageing data.....                                | 4 |
| 2.1 TTFQ <sub>x</sub> -T1:PC <sub>70</sub> BM..... | 4 |
| 2.2 TTFQ <sub>x</sub> -T1:ITIC .....               | 5 |
| 2.3 HFAQ <sub>x</sub> -T:PC <sub>60</sub> BM.....  | 5 |
| 2.4 HFAQ <sub>x</sub> -T:ITIC.....                 | 6 |
| 4. Aging data .....                                | 7 |
| 5. Second derivative analysis .....                | 8 |
| 6. Extraction probability .....                    | 8 |

## 1. Processing conditions

**TTFQ<sub>x</sub>-T1:PC<sub>70</sub>BM:** Solvent additive: 0.5 vol.-% DIO, no thermal annealing.

**TTFQ<sub>x</sub>-T1:ITIC:** Annealed at 150°C for 10 min inside the GB, no solvent additive.

**HFAQ<sub>x</sub>-T:PC<sub>70</sub>BM:** Solvent additive: 0.25 vol.-% DIO, no thermal annealing.

**HFAQ<sub>x</sub>-T:ITIC:** Annealed at 130°C for 10 min inside the GB, no solvent additive.

### Layer stack of the conventional architecture organic solar cell

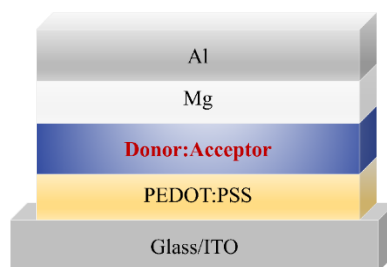

*Figure S1: The layer of fabricated organic solar cells in conventional architecture.*

## 2. PV parameters

*Table S1: Solar cell parameters of the TTFQ<sub>x</sub>-T1:PC<sub>70</sub>BM, HFAQ<sub>x</sub>-T:PC<sub>70</sub>BM, TTFQ<sub>x</sub>-T1:ITIC and HFAQ<sub>x</sub>-T:ITIC based solar cells.*

| Samples                                   | $J_{sc}$ [mA/cm <sup>2</sup> ] | $V_{oc}$ [mV] | FF [%] | PCE [%] | $R_s$ [Ω] | $R_p$ [Ω] |
|-------------------------------------------|--------------------------------|---------------|--------|---------|-----------|-----------|
| TTFQ <sub>x</sub> -T1:PC <sub>70</sub> BM | 12.48                          | 783           | 52     | 5.1     | 8         | 699       |
| HFAQ <sub>x</sub> -T:PC <sub>70</sub> BM  | 13.92                          | 878           | 58     | 7.07    | 9         | 516       |
| TTFQ <sub>x</sub> -T1:ITIC                | 12.65                          | 877           | 57     | 6.31    | 19        | 493       |
| HFAQ <sub>x</sub> -T:ITIC                 | 14.04                          | 870           | 52     | 6.36    | 7         | 1438      |

### 3. Aging fit

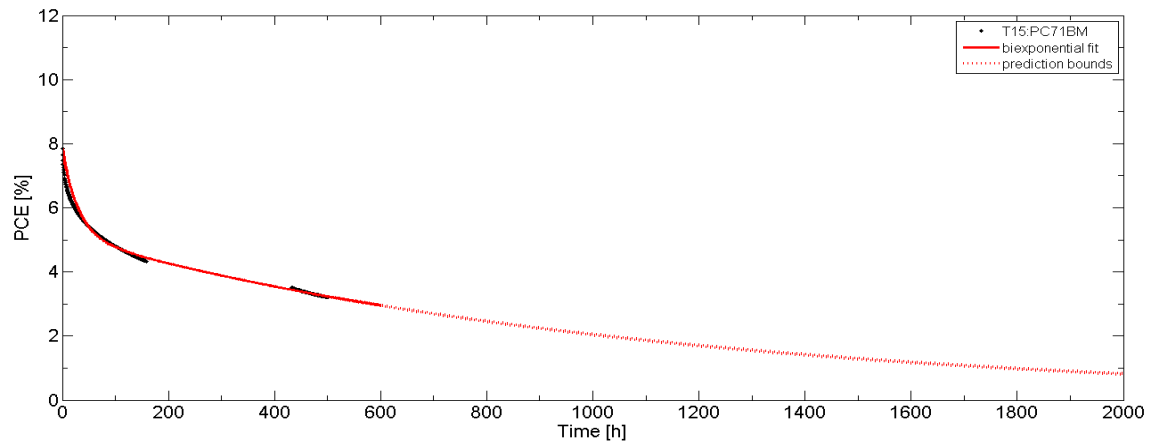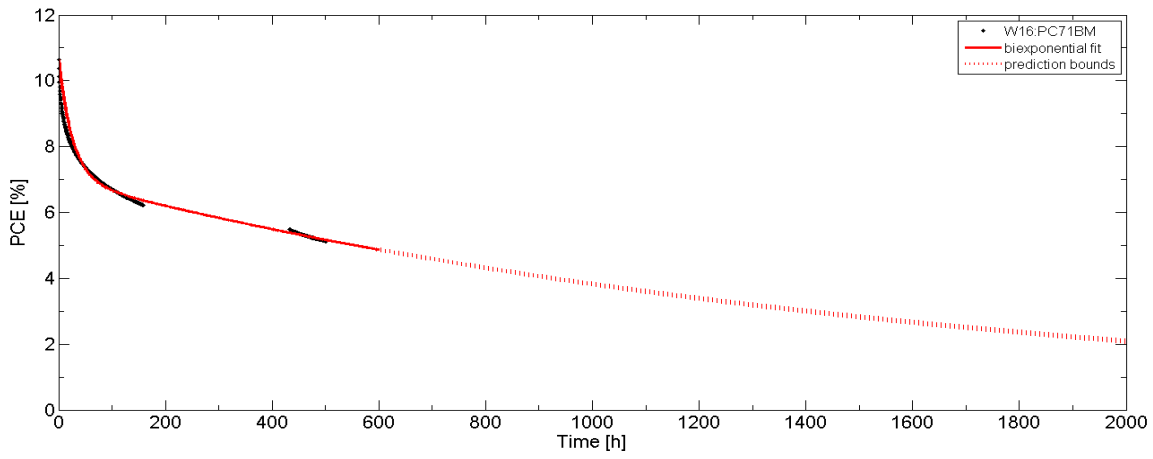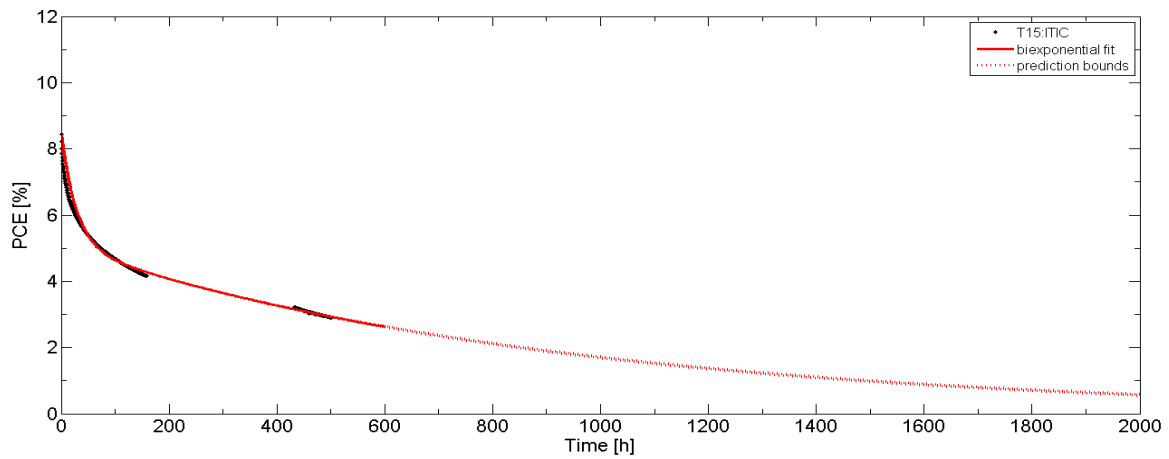

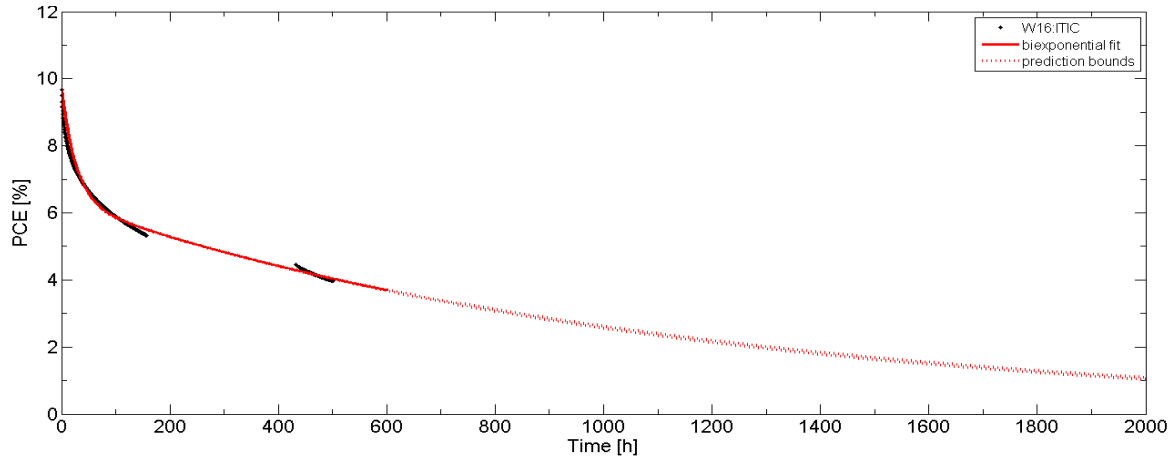

**Figure S2:** Bi-exponential fit of decay curves of TTFQx-T1:PC<sub>70</sub>BM, TTFQx-T1:ITIC, HFAQx-T:PC<sub>70</sub>BM and HFAQx-T:ITIC based solar cells.

## 2. Ageing data

### 2.1 TTFQx-T1:PC<sub>70</sub>BM

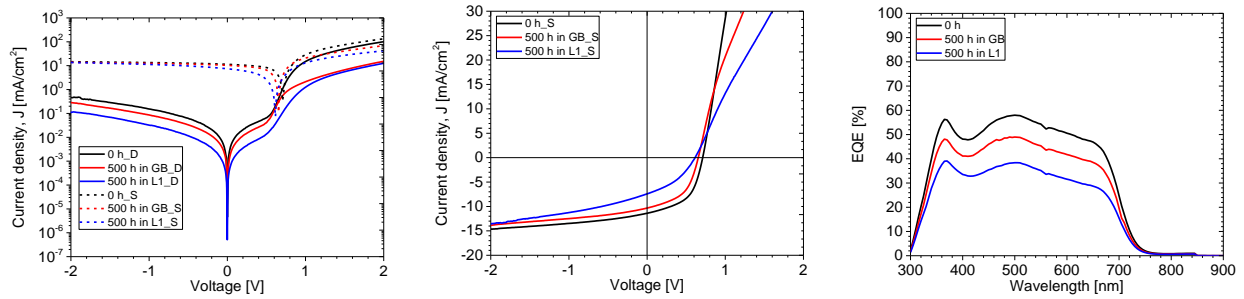

**Figure S3:** Dark J-V, sun J-V and EQE measurements of TTFQx-T1:PC<sub>70</sub>BM based solar upon three ageing conditions.

**Table S2:** Solar cell parameters of TTFQx-T1:PC<sub>70</sub>BM based solar upon three ageing conditions.

| Sample    | Ageing condition | Jsc (mA/cm <sup>2</sup> ) | Jsc_EQE (mA/cm <sup>2</sup> ) | Voc (mV) | FF (%) | PCE (%) | PCE_EQE (%) | Rs (Ohm) | Rp (Ohm) |
|-----------|------------------|---------------------------|-------------------------------|----------|--------|---------|-------------|----------|----------|
| SAI5015_3 | 0 hr             | 10.72                     | 10.58                         | 680      | 51     | 3.7     | 3.67        | 29       | 652      |
| SAI5015_3 | 500 hr in GB     | 10.32                     | 8.91                          | 653      | 50     | 3.3     | 2.91        | 38       | 618      |
| SAI5017_1 | 500 hr in L1     | 7.49                      | 7.2                           | 614      | 38     | 1.7     | 1.68        | 97       | 425      |

## 2.2 TTFQx-T1:ITIC

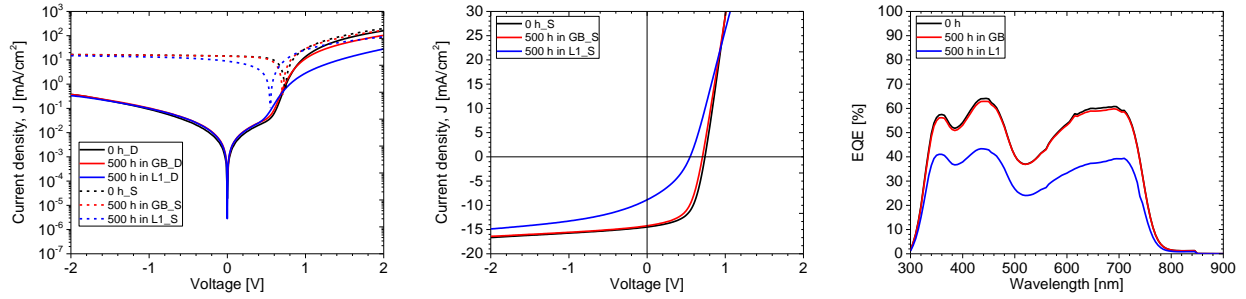

Figure S4: Dark J-V, sun J-V and EQE measurements of TTFQx-T1:ITIC based solar upon three ageing conditions.

Table S3: Solar cell parameters of TTFQx-T1:ITIC based solar upon three ageing conditions.

| Sample    | Ageing condition | Jsc (mA/cm <sup>2</sup> ) | Jsc_EQE (mA/cm <sup>2</sup> ) | Voc (mV) | FF (%) | PCE (%) | PCE_EQE (%) | Rs (Ohm) | Rp (Ohm) |
|-----------|------------------|---------------------------|-------------------------------|----------|--------|---------|-------------|----------|----------|
| SAI5024_1 | 0 hr             | 13.99                     | 12.81                         | 746      | 58     | 6.01    | 5.54        | 12       | 1238     |
| SAI5024_1 | 500 hr in GB     | 13.90                     | 12.65                         | 721      | 56     | 5.58    | 5.11        | 13       | 1076     |
| SAI5025_2 | 500 hr in L1     | 8.98                      | 8.53                          | 544      | 36     | 1.78    | 1.67        | 31       | 289      |

## 2.3 HFAQx-T:PC<sub>60</sub>BM

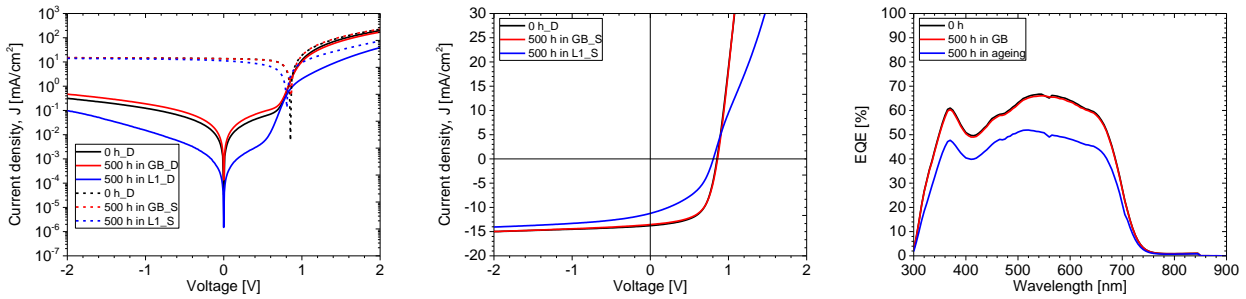

Figure S5: Dark J-V, sun J-V and EQE measurements of HFAQx-T:PC<sub>70</sub>BM based solar upon three ageing conditions.

Table S4: Solar cell parameters of HFAQx-T:PC<sub>70</sub>BM based solar upon three ageing conditions.

| Sample    | Ageing condition | Jsc (mA/cm <sup>2</sup> ) | Jsc_EQE (mA/cm <sup>2</sup> ) | Voc (mV) | FF (%) | PCE (%) | PCE_EQE (%) | Rs (Ohm) | Rp (Ohm) |
|-----------|------------------|---------------------------|-------------------------------|----------|--------|---------|-------------|----------|----------|
| SAI5020_1 | 0 hr             | 13.46                     | 12.41                         | 867      | 60     | 7.02    | 6.45        | 10       | 1828     |
| SAI5020_1 | 500 hr in GB     | 13.54                     | 12.24                         | 858      | 60     | 6.96    | 6.30        | 9        | 1624     |
| SAI5019_2 | 500 hr in L1     | 11.17                     | 9.64                          | 801      | 44     | 3.91    | 3.30        | 24       | 557      |

## 2.4 HFAQx-T:ITIC

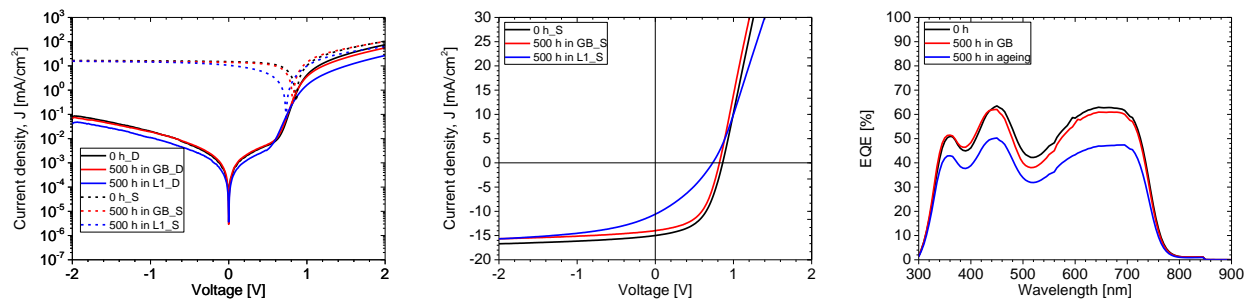

Figure S6: Dark J-V, sun J-V and EQE measurements of HFAQx-T:ITIC based solar upon three ageing conditions.

Table S5: Solar cell parameters of HFAQx-T:ITIC based solar upon three ageing conditions.

| Sample    | Ageing condition | Jsc (mA/cm <sup>2</sup> ) | Jsc_EQE (mA/cm <sup>2</sup> ) | Voc (mV) | FF (%) | PCE (%) | PCE_EQE (%) | Rs (Ohm) | Rp (Ohm) |
|-----------|------------------|---------------------------|-------------------------------|----------|--------|---------|-------------|----------|----------|
| SAI5030_4 | 0hr              | 14.09                     | 13.31                         | 847      | 54     | 6.41    | 6.09        | 18       | 1211     |
| SAI5030_4 | 500 hr in GB     | 13.98                     | 13.25                         | 819      | 52     | 5.98    | 5.64        | 21       | 1070     |
| SAI5027_1 | 500 hr in L1     | 10.63                     | 10.25                         | 767      | 34     | 2.79    | 2.67        | 30       | 340      |

## 4. Aging data

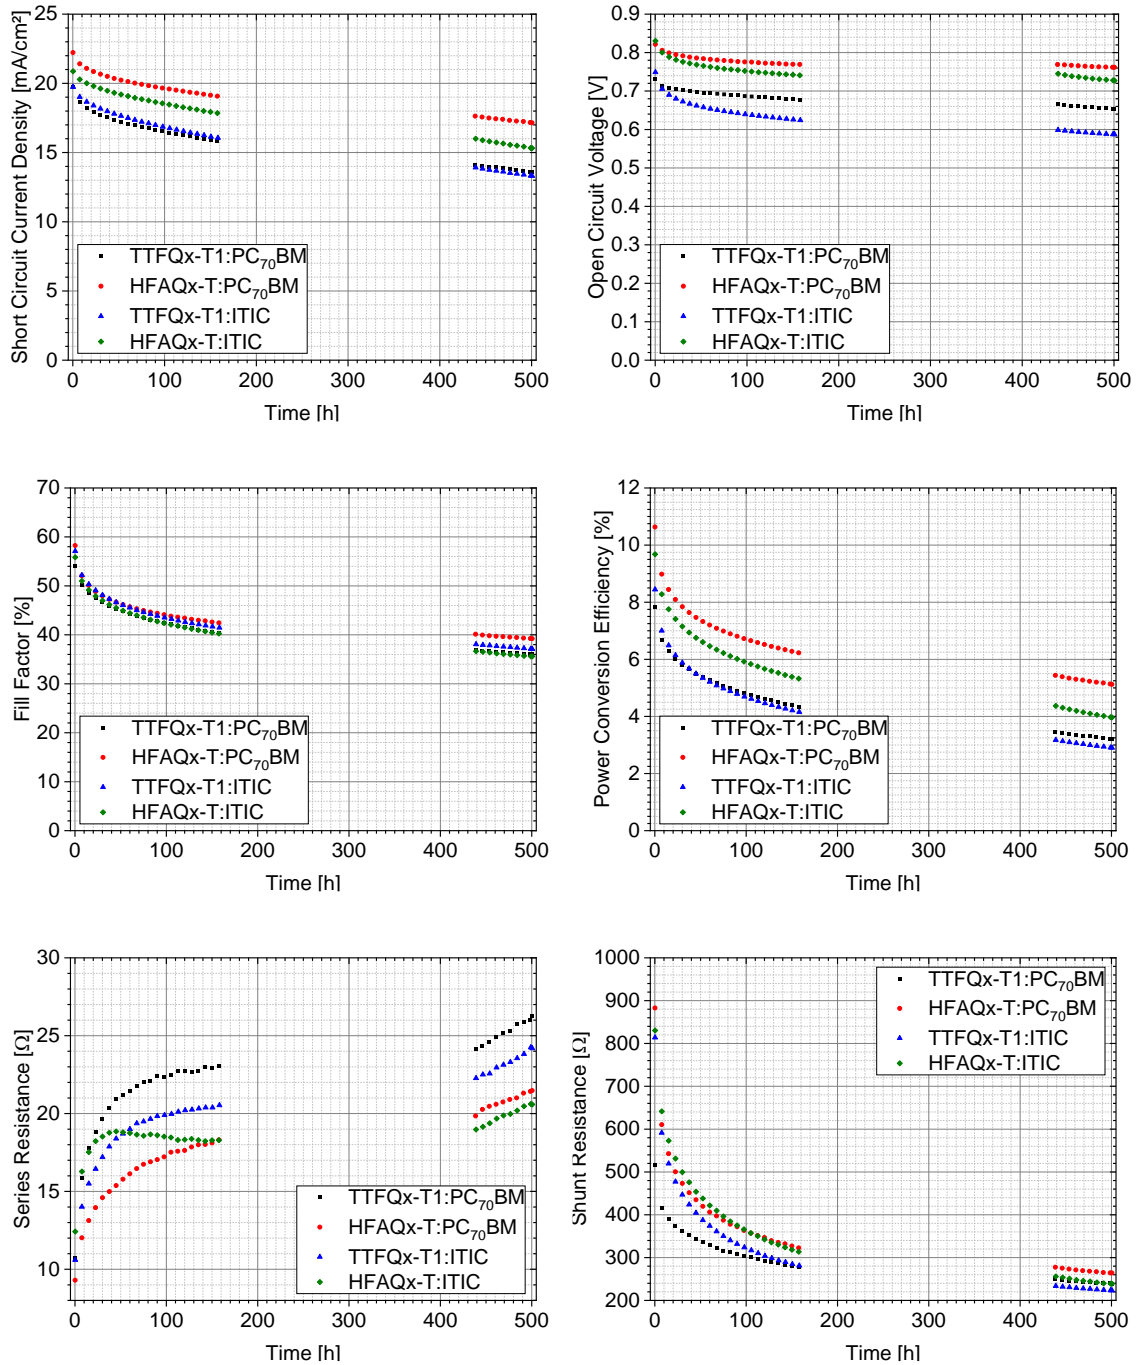

**Figure S7:** Photovoltaic parameters of the solar cells measured under continuous illumination for 500 h in ISOS-L1 setup. There was a problem with the measurement computer, so the recording of the data was interrupted.

## 5. Second derivative analysis

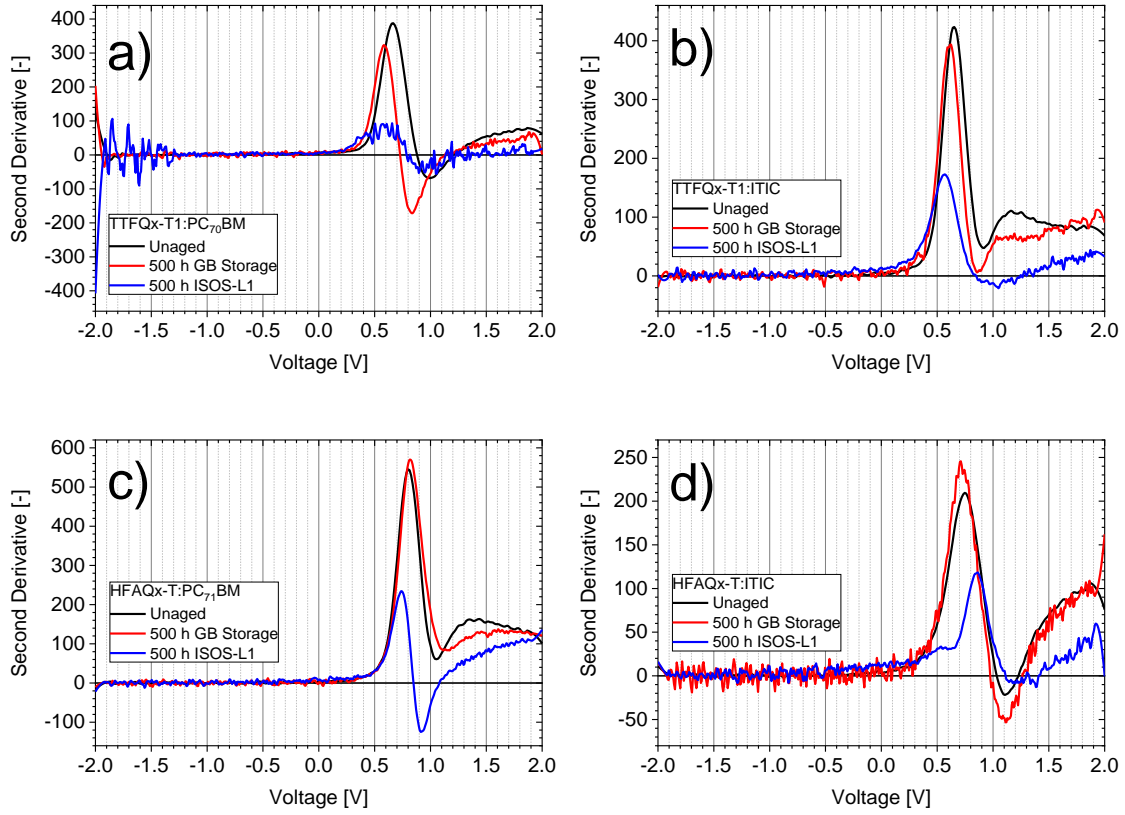

**Figure S8:** Second derivative analysis of the IV-Curves seen in for solar cells made from TTFQx-T1 with PC<sub>70</sub>BM (a) and ITIC (b), as well as HFAQx-T with PC<sub>70</sub>BM (c) and ITIC (d).

## 6. Extraction probability

**Table S6:** Summary of the extraction probability for aged and non-aged solar cells.

|                              | Aging condition | Extraction probability at J <sub>sc</sub> | Extraction probability at MPP |
|------------------------------|-----------------|-------------------------------------------|-------------------------------|
| TTFQx-T1:PC <sub>70</sub> BM | 0 h             | 0.80924                                   | 0.59223                       |
| TTFQx-T1:PC <sub>70</sub> BM | 0h in GB        | 0.76853                                   | 0.52854                       |
| TTFQx-T1:PC <sub>70</sub> BM | 0 h in ISOS-L1  | 0.55602                                   | 0.33671                       |
| TTFQx-T1:ITIC                | 0 h             | 0.89407                                   | 0.71094                       |
| TTFQx-T1:ITIC                | 0h in GB        | 0.8888                                    | 0.67986                       |
| TTFQx-T1:ITIC                | 0 h in ISOS-L1  | 0.6124                                    | 0.35039                       |
| HFAQx-T: PC <sub>70</sub> BM | 0 h             | 0.93933                                   | 0.75635                       |
| HFAQx-T:PC <sub>70</sub> BM  | 0h in GB        | 0.9325                                    | 0.7412                        |
| HFAQx-T:PC <sub>70</sub> BM  | 0 h in ISOS-L1  | 0.80754                                   | 0.52059                       |
| HFAQx-T:ITIC                 | 0 h             | 0.90545                                   | 0.68887                       |
| HFAQx-T:ITIC                 | 0h in GB        | 0.89805                                   | 0.66756                       |
| HFAQx-T:ITIC                 | 0 h in ISOS-L1  | 0.68023                                   | 0.38996                       |
